# Supplementary material for: A multi-residue analysis of sulphonamides in edible animal tissues using QuEChERS extraction and HPLC-MS/MS
Source: Royal Society of Chemistry journal article supplement (doi:10.1039/c4ay01727g), 2014-11-27
Supplement: c4ay01727g1.pdf [file c4ay01727g1.pdf]

## Supplementary data

### Appendix A

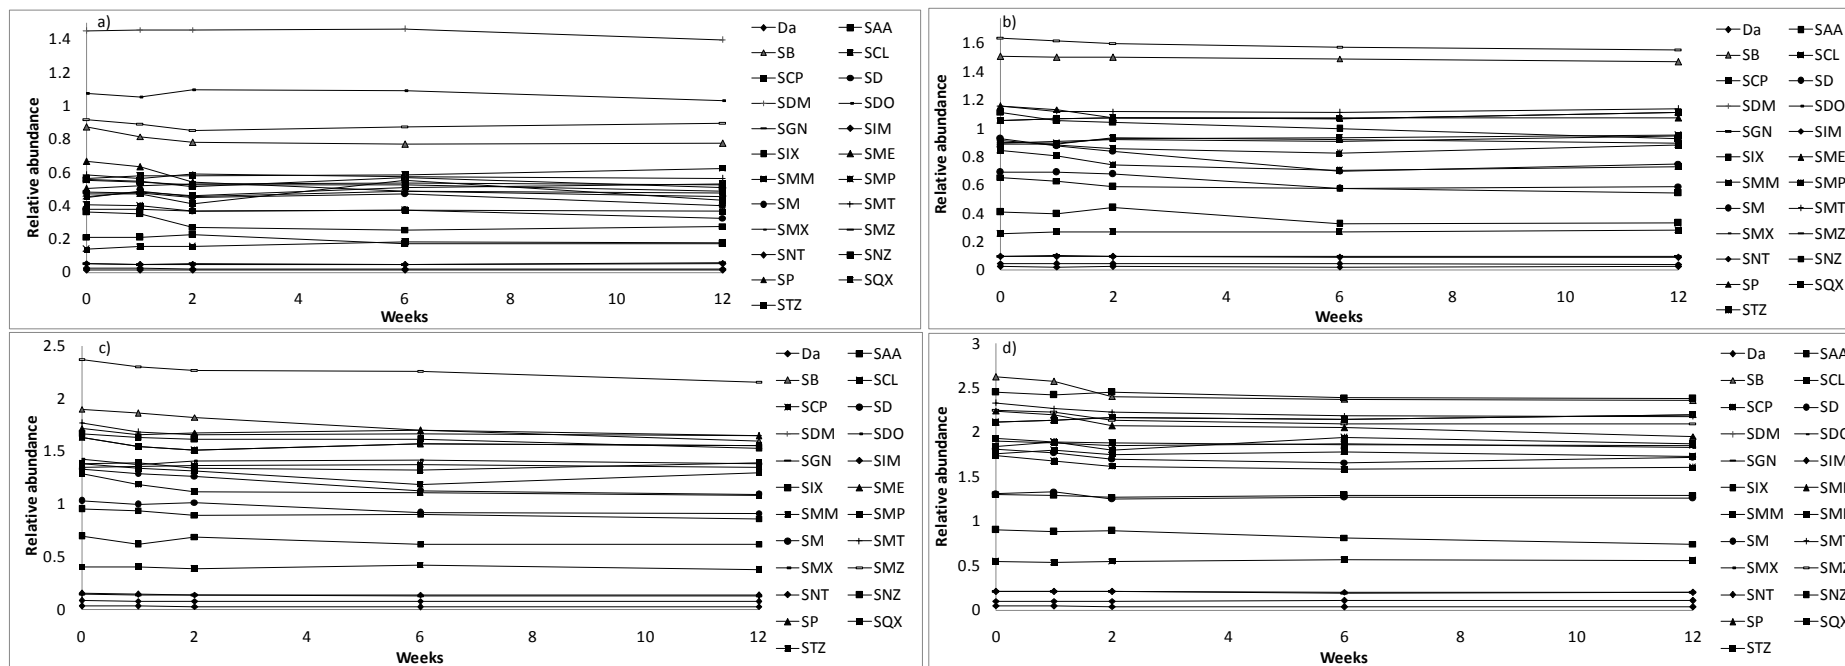

Fig.A1: Stability of SAs in spiked beef muscle at different concentrations a) 50 (1.25), b) 100 (2.5), c) 150 (3) and d) 200 (5)  $\mu\text{g.kg}^{-1}$  for respectively SAs and dapsone compounds.

## Appendix B

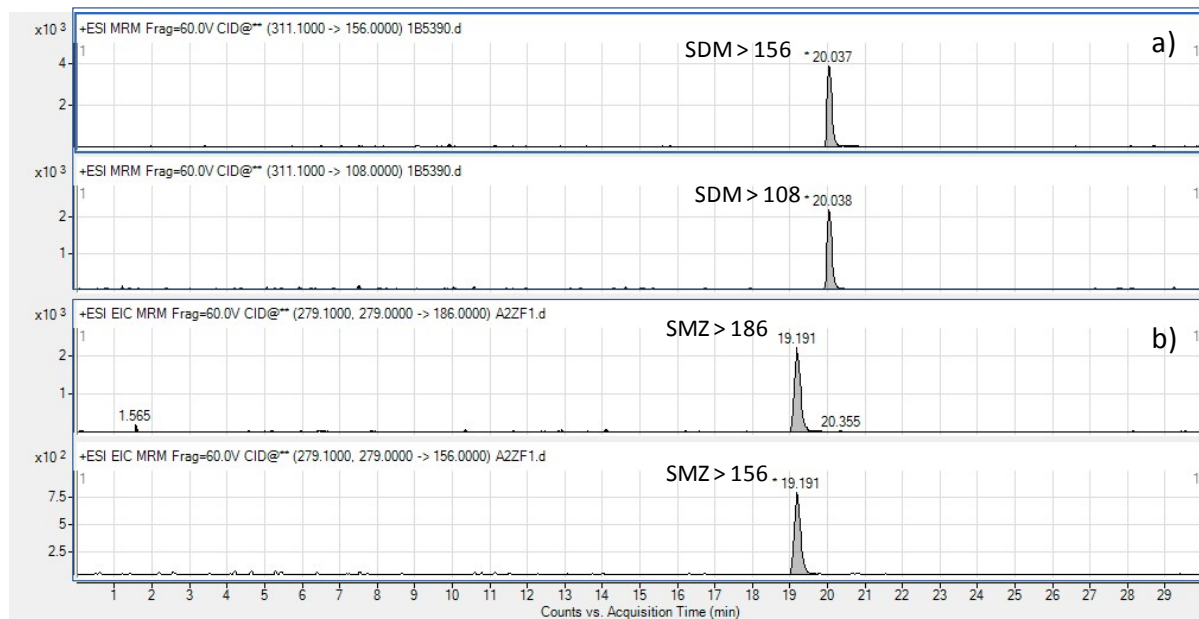

Fig. B1: LC-MS/MS chromatograms of some analysed samples (a) S5 containing SDM ( $59.1 \mu\text{g}\cdot\text{kg}^{-1}$ ) and (b) S20 containing SMZ ( $70.2 \mu\text{g}\cdot\text{kg}^{-1}$ ).

## Appendix C

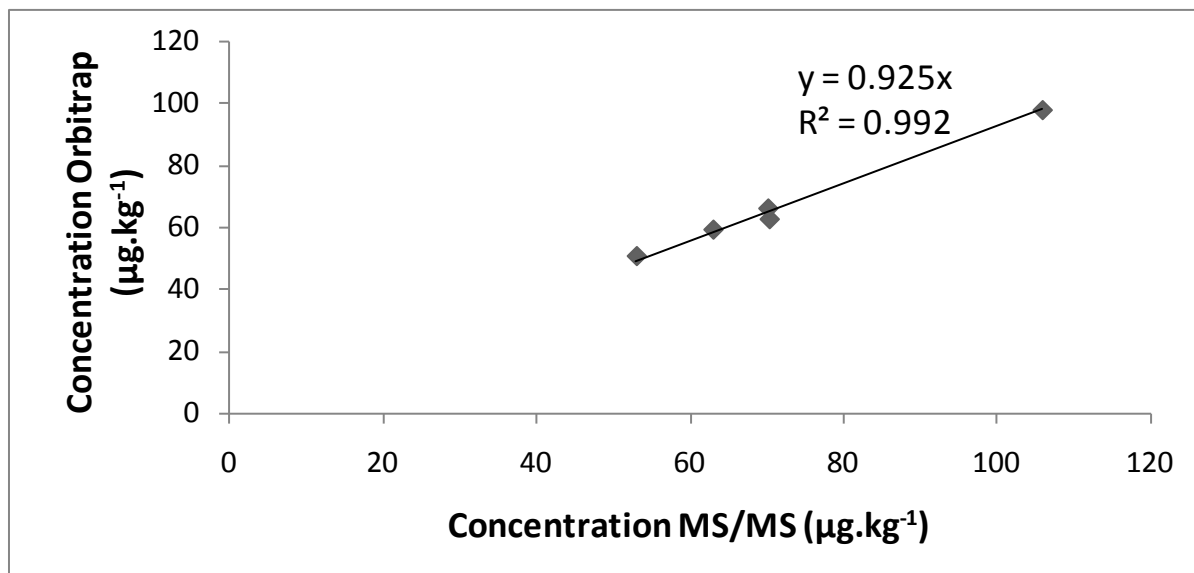

*Fig. C1: Correlation graph of concentrations (µg.kg<sup>-1</sup>) determined of studied compounds with triple quadrupole mass spectrometry (QqQ) and Orbitrap analyzers in meat samples.*
